1 **Widespread population variability of intron size in evolutionary old genes:**  
2 **implications for gene expression variability**

3 **Intronic CNVs and gene regulation**

4

5 Maria Rigau<sup>1</sup>, David Juan<sup>2</sup>, Alfonso Valencia<sup>1,3,¶,\*</sup> and Daniel Rico<sup>4,¶,\*</sup>

6

7 <sup>1</sup>Barcelona Supercomputing Centre (BSC), Barcelona, 08034, Spain.

8 <sup>2</sup>Institut de Biologia Evolutiva, Consejo Superior de Investigaciones Científicas–Universitat  
9 Pompeu Fabra, Parc de Recerca Biomèdica de Barcelona, Barcelona, 08003, Spain

10 <sup>3</sup>Institució Catalana de Recerca i Estudis Avançats (ICREA), Barcelona, 08010, Spain.

11 <sup>4</sup>Institute of Cellular Medicine, Newcastle University, Newcastle upon Tyne, NE2 4HH, United  
12 Kingdom.

13

14 <sup>¶</sup> These authors contributed equally to this work.

15 <sup>\*</sup> Corresponding authors

16 E-mails: [alfonso.valencia@bsc.es](mailto:alfonso.valencia@bsc.es), [daniel.rico@newcastle.ac.uk](mailto:daniel.rico@newcastle.ac.uk)

## 17 **Abstract**

18 Introns were originally thought to be “junk DNA” without function but accumulating evidence has  
19 shown that they can have important functions in the regulation of gene expression. In humans and  
20 other mammals, introns can be extraordinarily large and together they account for the majority of  
21 the sequence in human protein-coding loci. However, little is known about their structural variation  
22 in human populations and the potential functional impact of this genomic variation. To address this,  
23 we have studied how copy number variants (CNVs) differentially affect exonic and intronic  
24 sequences of protein-coding genes. Using five different CNV maps, we found that CNV gains and  
25 losses are consistently underrepresented in coding regions. However, we found purely intronic  
26 losses in protein-coding genes more frequently than expected by chance, even in essential genes.  
27 Following a phylogenetic approach, we dissected how CNV losses differentially affect genes  
28 depending on their evolutionary age. Evolutionarily young genes frequently overlap with deletions  
29 that partially or entirely eliminate their coding sequence, while in evolutionary ancient genes the  
30 losses of intronic DNA are the most frequent CNV type. A detailed characterisation of these events  
31 showed that the loss of intronic sequence can be associated with significant differences in gene  
32 length and expression levels in the population. In summary, we show that genomic variation is  
33 shaping gene evolution in different ways depending on the age and function of genes. CNVs  
34 affecting introns can exert an important role in maintaining the variability of gene expression in  
35 human populations, a variability that could be related with human adaptation.

## 36 **Author summary**

37 Most human genes have introns that have to be removed after a gene is transcribed from DNA to  
38 RNA because they not encode information to translate RNA into proteins. As mutations in introns  
39 do not affect protein sequences, they are usually ignored when looking for normal or pathogenic  
40 genomic variation. However, introns comprise about half of the human genome and they can have  
41 important regulatory roles. We show that deletions of intronic regions appear more frequent than  
42 previously expected in the healthy population, with a significant proportion of genes with  
43 evolutionary ancient and essential functions carrying them. This finding was very surprising, as  
44 ancient genes tend to have high conservation of their coding sequence. However, we show that  
45 deletions of their non-coding intronic sequence can produce considerable changes in their length,  
46 significant drops of GC content that could affect splicing or occur in introns harboring regulatory  
47 elements. Finally, we found that a significant number of these intronic deletions are associated with  
48 under- or over-expression of the affected genes, showing that intronic deletions can be responsible  
49 for gene expression variability in ancient genes with highly conserved protein sequences. Our data  
50 suggests that the frequent gene length variation in ancient genes resulting from intronic CNVs  
51 might have an important role in the fine-tuning of their regulation in different individuals.

## 52 **Introduction**

53 Most eukaryotic protein coding genes contain introns that are removed from the messenger RNA  
54 during the process of splicing. Although the potential functions of introns remain elusive, a number  
55 of cases support the idea that the potential energetic disadvantage that they represent for the cell  
56 might be compensated by a number of acquired functionalities [1–3]. For example, introns make  
57 possible the expression of multiple transcription products from a single gene by alternative splicing  
58 and facilitate the formation of new genes by exon shuffling [3,4].

59 Human introns are longer than those of other vertebrates and invertebrates [5,6] and their lengths  
60 are very variable, contrarily to exon lengths. This variability in intron length leads to substantial  
61 differences in size among human genes, which cause differences in the time taken to transcribe a  
62 gene from seconds to over 24 hours [7]. Introns can influence several steps of gene transcription  
63 [8,9] and it has been seen that a considerable amount of intronic sequence is important in regulating  
64 gene expression [10].

65 Introns contribute to the control of gene expression by their inclusion of regulatory regions and  
66 non-coding functional RNA genes or directly by their length [3,11,12]. Indeed, intron size is highly  
67 conserved in genes associated with developmental patterning [13], suggesting that genes that  
68 require a precise time coordination of their transcription are reliant on a consistent transcript length.  
69 Highly expressed genes are enriched in housekeeping essential functions [14] and tend to have  
70 shorter introns [15]. It has been suggested that selection could be acting to reduce the costs of  
71 transcription by keeping short introns in highly expressed genes [15]. Genes transcribed early in  
72 development [16–18] and genes involved in rapid biological responses [19] also conserve intron-

73 poor structures. Shorter introns would allow these genes to be transcribed faster and thus they may  
74 be particularly sensitive to changes in the time to be transcribed. Interestingly, Keane and Seoighe  
75 [20] recently found that intron lengths of coexpressed genes or genes participating in the same  
76 protein complexes tend to coevolve (their intron sizes show a significant correlation across species)  
77 possibly because a precise temporal regulation of the expression of these genes is required.

78 Despite their potential importance in regulating transcription levels, transcription timing and  
79 splicing, little attention has been paid to the potential role of introns in human population  
80 variability studies. Given that direct associations between intronic mutations and certain diseases  
81 have been reported [24–27], we need to characterise the normal genetic variability in introns so we  
82 can better distinguish normal from pathogenic variations.

83 It is increasingly apparent that one of the most important sources of variability is the presence of  
84 copy number variants (CNVs). CNVs are defined as imbalanced structural variants that result in the  
85 gain or loss of >50 bp of genomic sequence [28] and appear in more than one individual of the  
86 population. CNVs can be classified in gains (regions that are found duplicated when compared with  
87 expected number from the reference genome, which is 2 for autosomes), losses (homozygously or  
88 heterozygously deleted regions) or gain/loss CNVs (regions that are found duplicated in some  
89 individuals - or alleles - and deleted in others). Microarray and next generation sequencing  
90 approaches have shown that CNVs are more important and frequent than originally thought. CNVs  
91 may have neutral, advantageous or pathological consequences [29]. Initially, CNVs thought to  
92 account for about 1% of the entire human genome [30], current estimates range from 4.8 to 9.5%  
93 [31].

94 Here, we have studied the effect of intronic variants using CNV maps of high resolution. Most of  
95 these CNVs have been detected using whole genome sequencing (WGS) data, which allows to  
96 determine the exact genomic boundaries of these variants and thus their overlap with exons and/or  
97 introns. Despite significant advances in the detection of CNVs, discovery and genotyping of these  
98 variants remain challenging [32]. To gain consistency, we have analyzed in parallel 5 recent CNV  
99 maps obtained by different groups with different experimental and analysis systems [31,33–36]. We  
100 have been able to compare the effect of the CNVs overlapping totally or partially with the genes of  
101 different evolutionary ages, studying in depth the effect of the intronic variants. We show how  
102 intronic variation results in widespread gene length variability in human populations and the  
103 potential impact of this variability in splicing and gene expression.

## 104 **Results**

### 105 **Most genic CNVs fall within introns**

106 CNVs can affect genes in different ways depending on the degree of overlap with them. Some  
107 CNVs cover entire genes (from now on *whole gene CNVs*), other CNVs overlap with part of the  
108 coding sequence but not the whole gene (*exonic CNVs*) and other CNVs are found within intronic  
109 regions (*intronic CNVs*, **Fig 1A**). As defined, intronic CNVs do not overlap with exons from any  
110 annotated transcript isoforms or with exons from overlapping genes.

111 To analyze the impact of CNVs on protein coding genes in healthy humans, we used five recently  
112 published, high resolution CNV maps [31,33–36]. Each of the maps has been derived from a  
113 different number of individuals, from different populations and using different techniques and  
114 algorithms for CNV detection (**S1 Fig** and **S1 Table**). Due to these differences, each dataset  
115 provides us with a different set of CNVs (**S1 Fig**), which we analysed independently. We only  
116 considered the variants present in at least 2 individuals in a dataset, filtering out the variants  
117 mapped in sex chromosomes and the private variants within each map.

118 The total number of autosomal protein coding genes overlapping with common CNVs varies  
119 depending on the filtered map, ranging from 1,694 (according to Handsaker's map [34]) to 5,610  
120 (Sudmant-Nature's map [36]), with a total of 7,267 genes (out of 19,430 autosomal protein-coding  
121 genes) affected by CNVs when aggregating all 5 maps. Remarkably, only 402 (5.5%) of all genes  
122 affected by CNVs coincide in the 5 maps (**S2 Fig**). However, this overlap is non-random ( $P < 2.2e$ -  
123 16).

124 Most of the CNVs overlapping with genes fall within intronic regions (~63% of all CNVs) without  
125 any overlap with exons. More surprisingly, of the purely intronic CNVs detected, over the 94% are  
126 losses or gain/loss CNVs. This is in stark contrast with whole gene CNVs, which tend to be  
127 exclusively gains (55% of the cases) or gain/loss CNVs (25% of the cases) (**Fig 1B-F**). There is a  
128 significant enrichment of purely intronic losses ( $P < 0.001$ ; permutation testing) in 4 out of 5 maps,  
129 with 6 to 15% more deletions falling in introns than expected by chance, depending on the CNV  
130 map. (No significant differences with the expected values were found with Sudmant-Science's map,  
131  $P = 0.6683$ ). In contrast, in protein-coding genes, there were 13-70% fewer CNV deletions  
132 overlapping with exons than would be expected by chance, depending on the map ( $P < 0.05$  in all  
133 maps).

134 Given the potential regulatory role of introns and the high frequency of purely intronic deletions in  
135 the population, we focused on the impact of CNVs on introns. For all the subsequent analyses we  
136 restricted our set of CNVs to loss and gain/loss CNVs, as they together represent sequences that are  
137 lost in some individuals. It is important to note that three maps (Sudmant-Nature's [36], Zarrei's  
138 [31] and Abyzov's [33]) together represent the 86% of all intronic deletions from our datasets. The  
139 methods used to generate the other two maps (Handsaker's [34] and Sudmant-Science's [35]) tend  
140 to detect less losses and larger CNV regions, that result in maps with fewer purely intronic deletions  
141 (**S1 Fig**).

142 For the above reasons, we focused our analyses of intronic deletions on the three maps with more  
143 intronic deletions (Sudmant-Nature's [36], Zarrei's [31] and Abyzov's [33]). We checked that this  
144 enrichment of intronic losses was still significant when controlling for different intron sizes (**S3**



145 **Fig**) and DNA replication timing ( $P < 5e-04$ ; permutation testing).

146 Finally, we tested whether intronic losses were distributed equally between essential and non-  
147 essential genes. We separated the protein-coding genes into two groups: those that have been  
148 reported to be essential after CRISPR-based genomic targeting [37,38] or gene-trap insertional  
149 mutagenesis methodology [39], and those which were not found to be essential. Strikingly, we  
150 observed that the proportion of intronic deletions is higher than expected by chance in both  
151 essential and non-essential genes (**S2 Table**). The fact that these intronic deletions can appear in  
152 essential genes suggests that they might be an unexpected source of genetic variation that could  
153 potentially influence the regulation of functionally relevant genes in human populations.

154

155 **Intronic losses accumulate in evolutionarily old genes, while losses in coding regions are more**  
156 **frequent in young genes**

157 Intrigued by the overrepresentation of intronic deletions in human protein-coding genes, we next  
158 investigated in more detail the quantitative and functional impact of these deletions. We have  
159 previously reported that the evolutionarily younger a gene is, the more likely it is to carry whole  
160 gene CNVs in the population [40]. Here we confirm that most ancient genes are depleted of CNVs  
161 that affect their coding regions, while primate-specific genes are enriched in CNVs (**S4 Fig**). This  
162 pattern was also observed when CNV gains were excluded (**Fig 2A**). The generation of random  
163 background models revealed that ancient genes were significantly depleted of coding region losses  
164 (both exonic and whole gene) ( $P < 0.05$ ), while these were enriched in young genes ( $P < 0.05$ ) (**Fig**  
165 **2A**).

166 Surprisingly, we observed an opposite trend for purely intronic deletions: the proportion of ancient  
167 genes with intronic deletions was higher than that of young genes, and also higher than expected by  
168 chance (**Fig 2B**). This finding was confirmed with additional analyses considering only genes with  
169 introns and adjusting by the different size distributions of introns (**S5 Fig**). The introns of essential  
170 genes tend to be shorter [21,22] and essential genes also tend to be ancient [41]. Therefore, we  
171 compared the intron size of genes within the same age groups and found that the introns of essential  
172 genes are shorter than those of non-essential genes of the same age (**S6A and S6B Fig**).

173 Even if introns are shorter in essential genes, we found a significant proportion of them present  
174 intronic deletions in the Sudmant-Nature's map [36] (**S6C Fig**) suggesting that intronic size  
175 variation in the population might be more important than we originally thought.

176

### 177 **Intronic deletions result in population variation of gene lengths**

178 The percentage of each intron that can be lost due to CNV losses is highly variable, from 0.03% to  
179 96.8%, representing a loss of the 0.01% to 77.5% of the total genic size. (**Fig 3A-C**). Some  
180 examples of genes with a notable change in size after a single intronic deletion are the neuronal  
181 glutamate transporter SLC1A1, with a loss of the 37% of its genic size, TCTN3 (tectonic family  
182 member 3), which loses 45% of its gene size and the LINGO2 (Leucine Rich Repeat And Ig  
183 Domain Containing 2, alias LERN3 or LRRN6C) gene with a loss of the 34% of its size (**Fig 3D**).  
184 Remarkably, these genes are highly conserved at the protein level and are amongst the 20% of  
185 genes most intolerant to functional variation according to the ranking of the RVIS (Residual  
186 Variation Intolerance Score) gene scores, which is based on the amount of genetic variation of each

187 gene at an exome level [42]. This result shows that genes with a very conserved coding sequence  
188 with a general depletion of deletions [36] can have important losses of intronic regions, which  
189 might affect their regulation without affecting their protein structure.

190 Intronic deletions can impact regulatory regions such as enhancers or CTCF binding sites, which  
191 are enriched ( $P < 1e-04$ ) and impoverished ( $P < 1e-04$ ) in introns, respectively. Indeed, we find very  
192 frequently deletions in introns with these regulatory features ( $P < 2.2e-16$ ). However, the direct  
193 overlap of the deletions with both enhancers and CTCF binding sites is significantly lower than  
194 expected by chance ( $P < 1e-04$ , **S3 Table**). This suggests intronic losses can occur close to  
195 regulatory features within introns but that deleting part of a regulatory feature might often have a  
196 deleterious impact.

197 Besides altering the size of the introns or disrupting regulatory regions, intronic deletions could also  
198 affect splicing, which is required to avoid the translation of introns. In genes with long introns, the  
199 recognition of introns and exons by splicing machinery is based on their differential GC content  
200 (Amit et al. 2012, Gelfman et al 2013) as the lower GC content in introns facilitates their  
201 recognition. Presumably, this recognition mechanism has contributed to the expansion of introns in  
202 higher eukaryotes (Hollander et al 2016). We analyzed the GC content of introns with deletions and  
203 found that the deleted sequences had a significantly higher GC content to that of the introns where  
204 they are located ( $P = 1.8e-28$ ). Moreover, we observed that the loss of these fragments decreased  
205 significantly the overall GC content of the remaining introns ( $P = 2.23e-16$ ). Our results suggest  
206 that the deletion of GC rich regions within introns could lower the overall GC content of the intron,  
207 increasing the difference of GC content between introns and their flanking exons, what could

208 facilitate exon definition during splicing (**S8** and **S9 Fig**).

209 We have shown that deletions within introns are widespread in introns of varying sizes and can  
210 produce important changes on the sequence composition and the regulatory architecture of many  
211 protein-coding genes, which might be relevant for transcription and splicing of those genes through  
212 different mechanisms. Intronic deletions constitute a previously unexpected source of variation in  
213 gene and transcript length across individuals and can subtly affect ancient genes with important  
214 functions that don't tolerate more drastic alterations.

215

#### 216 **Effect of intronic deletions on gene expression**

217 Multiallelic CNVs affecting whole genes have been shown to correlate with gene expression:  
218 generally, the higher the number of copies of the gene, the higher its expression levels [34,36]. Our  
219 data suggests that the intronic size variation could also impact the expression of the affected genes.  
220 Therefore, we looked into the possible effect of intronic hemizygous deletions on gene expression  
221 variation at the population level, comparing the effects with hemizygous deletions in coding (whole  
222 gene and exonic) and intergenic non-coding deletions. We used available RNA-seq data from  
223 Geuvadis [43] that was derived from lymphoblastoid cell lines for 445 individuals for whom we  
224 have the matching CNV data (Sudmant Nature's map [36]). In order to look for differences in gene  
225 expression we selected variants for which we had at least 2 hemizygous individuals (individuals  
226 with copy number = 1) and at least 2 wild-type individuals (copy number = 2) and we compared the  
227 expression levels among these two groups (**Fig 4A** and **S10 Fig**).

228 We first studied the effect of intronic deletions on gene expression and we observed significant  
229 differences in gene expression in 52 out of the 1,474 genes with intronic deletions (3.5%) in  
230 lymphoblastoid cell lines. This percentage is higher than expected by chance ( $P = 1e-4$ ) (**Fig 4**),  
231 being the expected values the total of differentially expressed genes (DEGs) when randomizing the  
232 individuals carrying the mutation. Of the DEGs, 62% were downregulated and the other 38%  
233 upregulated, suggesting that intronic deletions might result both in enhancing or repressing gene  
234 expression.

235 We investigated if deletions in introns of genes showing differential expression tended to overlap  
236 with regulatory features, but we did not observe any significant enrichment ( $P = 1$ ). Even though  
237 first introns are known to be particularly important for gene regulation [3,44], there was no  
238 significant enrichment of DEGs with their first intron affected ( $P = 0.86$ ). These results suggest that  
239 other mechanisms independent of intronic regulatory regions might be responsible for these  
240 changes in gene expression. It is also possible that a combination of multiple different mechanisms  
241 may be necessary to explain the observed effects. In addition, we cannot rule out that the lack of  
242 association between intronic regulatory features and gene expression changes is due to the small  
243 number of DEGs in this cell type and/or lack of detailed enough epigenomic annotations.

244 We wondered how the impact of non-coding intronic deletions in gene expression compared to  
245 those of non-coding intergenic deletions. We focused on intergenic regions that show long-range  
246 interactions with promoters of protein-coding genes - what it is generally assumed to reflect a  
247 regulatory function for these intergenic regions [45]. The impact of noncoding intronic versus  
248 intergenic deletions on gene expression was therefore studied. We used promoter-capture Hi-C

249 published data for B-lymphocytes [46] to link deletions in intergenic regions with interacting genes.  
250 Significant changes in gene expression were seen in 11 out of 872 (1.26%) genes identified to have  
251 a deletion in an intergenic contacting region. Contrary to the effect of intronic deletions within the  
252 same gene, this percentage of DEGs was not different to that expected by chance ( $P = 0.08$ ).  
253 Therefore, our data suggests that variation within intronic regions may have a more significant  
254 impact on gene regulation than intergenic regions.

255 The effect on gene expression appears to be greater when coding regions were affected, compared  
256 to purely intronic sequence losses: 15 out of 51 (29.4%,  $P < 1e-4$ ) whole gene deletion CNVs  
257 resulted in significant downregulation of gene expression and 30 out of 239 genes with partial  
258 exonic deletions that were differentially expressed (12.6%, 28 down- and 2 up-regulated ( $P < 1e-4$ )).  
259 However, given the higher frequency of intronic deletions in the population, the absolute number of  
260 DEGs with intronic deletions (52 genes) was similar to the total of DEGs with coding deletions (45  
261 genes, **Fig 4B** and **S4 Table**). Moreover, while coding losses mostly associate to gene down-  
262 regulation, intronic losses are frequently associated to gene up-regulation. This shows the potential  
263 global relevance of intronic deletions on gene expression, especially considering their frequency in  
264 ancient genes (27.9 % in genes older than Sarcopterygii) is almost the double than the one for  
265 coding deletions (14.6%, **Fig 2**). In summary, these data suggest that intronic variants could have an  
266 important regulatory impact on ancient genes.

## 267 **Discussion**

268 Several studies have explored copy number variation in healthy humans [31,33–36,47–50], many of  
269 which have reported common CNVs overlapping with protein coding regions less frequently than  
270 expected by chance [29,31,35,36,47]. However, little attention has been paid to introns and, to the  
271 best of our knowledge, no previous study has dissected the differential impact of CNVs on exonic  
272 and intronic regions. Taking five recently published CNV maps [31,33–36], we observed an  
273 enrichment of deletions in introns resulting in gene length differences among individuals.

274 The different CNV maps used were built using different datasets and CNV calling algorithms,  
275 resulting in very different numbers of CNV sizes and types. Still, we think that each of these studies  
276 has their own limitations and probably none of them actually reflects all the variability in the  
277 genome. Therefore, instead of merging them into one map, we preferred to analyse the maps in  
278 parallel. This allowed us to compare the consistency of the results and, at the same time, helped us  
279 to better understand the peculiarities of each CNV set. We saw very consistent trends when we  
280 analysed the enrichment of intronic deletions or the differential impact of CNVs depending of the  
281 evolutionary age of genes, what show the robustness and generality of our results. At the same time  
282 our data suggest that using the different maps in parallel can be a useful way to cross-validate  
283 biological findings.

284 Structural variants in the germline DNA constitute an important source of genetic variability that  
285 serves as the substrate for evolution. Therefore, dating the evolutionary age of genes allows the  
286 study of structural variants that were fixed millions of years ago. We have previously shown that  
287 genes of different ages are found in different proportions within current human CNV regions [51].

288 Whole young gene loci, contrarily to ancient gene loci, are very variable in copy number and tend  
289 to be located in late replicating genomic regions, which are more error-prone and have less precise  
290 DNA repair mechanisms than earlier regions [51]. Fixation of duplications or losses of whole genes  
291 in these regions can lead to the birth of new genes or to their disappearance (**Fig 5**).

292 Here, we have observed that also gains and losses affecting only part of the coding sequence are  
293 also enriched in young genes (**Fig 5**). Such CNVs can disrupt the protein sequence, but they can  
294 also eliminate, duplicate or relocate exons or parts of exons, giving to the organism a mechanism to  
295 modify young genes.

296 On the other hand, evolutionarily ancient genes, generally depleted of CNVs overlapping with their  
297 coding regions, are especially enriched with intronic losses (**Fig 5**). This phenomenon shows that  
298 although the protein sequence is usually unaffected, changes in the intronic sequence can modulate  
299 the expression of the gene and promote variability in the population. We found in lymphoblastoid  
300 cells more differentially expressed genes associated with intronic losses than expected by chance.  
301 This association is expected to be even stronger as for many genes the effect of their intronic losses  
302 will be only observed in other cell types or tissues.

303 Very interestingly, we observed differences in which genes show changes in gene expression when  
304 affected by coding (exonic or whole gene) or purely intronic losses. We see that differences in  
305 expression in younger genes are mainly associated to full gene dosage changes or partial disruption  
306 of their coding sequence. In contrast, ancient genes that generally are less tolerant to any kind of  
307 mutations in their coding sequence, are enriched in intronic deletions which that could be  
308 modulating their expression (**Fig 5**). The availability of CNV and population-based gene expression



309 data from several tissues will allow to evaluate more accurately what is the impact of coding and  
310 non-coding deletions in the whole organism.

311 CNVs can be directly disrupting a regulatory feature or affect the distance, for example, between  
312 promoter and enhancer. We found that the presence of enhancers is significantly enriched in  
313 introns, agreeing with previous findings in plants [11,44]. In general, genes with complex  
314 regulation patterns require more regulatory DNA [52] and introns tend to be longer in tissue-  
315 specific and transcription factor genes compared to housekeeping genes [21,53]. Since many  
316 enhancers are tissue-specific [54] intronic CNVs might frequently have effects on particular cell  
317 types. Therefore, the loss of intronic sequence might be affecting the expression of such genes in a  
318 tissue-specific manner.

319 Our results also suggest that non-coding intronic deletions might have a wider impact on population  
320 gene expression variability than deletions in non-coding intergenic regions that interact with  
321 promoters, given that intronic deletions correlate with gene expression changes more often than  
322 expected by chance, while promoter-interacting intergenic regions don't. However, intergenic  
323 deletions were associated with genes using promoter-capture HiC data maps derived from a few  
324 pooled genomes [46] and we may need to have personal genome interactomes, more tissues and  
325 conditions to evaluate more precisely the effect of intergenic deletions on gene expression.  
326 Furthermore, with the necessary experimental and analytical future advances, it will be extremely  
327 exciting to see how individual copy number variants change the personal landscape of interactions  
328 among promoters and other genomic elements.

329 We speculate that intronic CNVs might have a previously unsuspected role in shaping gene  
330 expression variability in populations with potential important consequences in human evolution and  
331 adaptation. After uncovering the relevance of gene length variation in the healthy population by  
332 frequent intronic deletions, the next open question will be if any of these common non-coding  
333 variants may be associated with disease. In fact, these population-based CNV maps could be useful  
334 to identify disease relevant and irrelevant intronic regions. It is now well known that most genome-  
335 wide association studies (GWAS) associated SNPs tend to be located in intronic and intergenic  
336 regions and the pathogenicity of non-coding CNVs, mostly in upstream promoters, is starting to  
337 emerge [55]. Thus, future case-control studies including WGS should also pay attention at  
338 potentially important role of purely intronic variation. While exons cover around the 2.8% of the  
339 genome, introns cover 35.3%, of the genome (based on the gene set used for this study). WGS  
340 studies are starting to focus on distal intergenic enhancers, but intronic regions are commonly  
341 ignored in the analyses. A recent analysis of the literature has revealed a substantial amount of  
342 pathogenic variants located “deep” within introns (more than 100 bp from exon-intron boundaries)  
343 which suggests that the sequence analysis of full introns may help to identify causal mutations for  
344 many undiagnosed clinical cases [27]. With the results presented here, we emphasize the  
345 importance of sequencing and analysing variants located in introns as they can potentially be as  
346 consequential as regulatory elements found in intergenic regions.

347 Being intronic deletions so common in the healthy population, it will also be interesting to explore  
348 how frequent are purely intronic somatic deletions in cancer and evaluate their potential  
349 contribution to the reprogramming of gene regulation of cancer cells. For example, are there  
350 somatic deletions of intronic sequences that result in the shortening of oncogenes, favoring their

351 higher expression. The role of cancer somatic variants in distal regulatory regions is just starting to  
352 be explored [56–60]. As we have shown that intronic regions are significantly enriched in  
353 regulatory regions in the human genome, understanding the functional effect somatic intronic  
354 deletions in cancer could be an attractive new field of research with high potential for discovery. It  
355 has been previously proposed that high-order chromatin architecture is influencing the landscape of  
356 chromosomal alterations in cancer [61]. We hypothesize that the high-order genome organisation in  
357 healthy cells is applying constraints on where variability can be high or low, allowing high  
358 variability anywhere in young genes but only in introns for ancient genes. Therefore, it will be  
359 interesting to understand better how these constraints change comparing data from healthy cells  
360 with the frequent aneuploidy in tumors, especially in radical re-structuring events originated by  
361 chromothripsis [62].

362 In summary, our data shows that intronic CNVs constitute the most abundant form of CNV in  
363 protein-coding genes. These intronic length variation possibly means that the actual size of many  
364 genes is not yet fixed in human populations. We show that intronic length variation is particularly  
365 frequent in evolutionary old genes, with a significant proportion of them showing associated gene  
366 expression changes. This suggests that intronic CNVs might be actively contributing to the  
367 evolution of gene regulation in many genes with highly conserved protein sequences. Taken  
368 together, our results suggest that copy number variation is shaping gene evolution in different ways  
369 depending on the age of genes, duplicating or deleting young genes and fine-tuning the regulation  
370 of old genes.

## 371 **Materials and methods**

### 372 **Origin and filtering of CNV maps**

373 Whole genome CNV maps were downloaded from 5 different publications [31,33–36]. For our  
374 analysis we selected autosomal and not private CNVs. Some extra filters were applied to some  
375 maps: In Handsaker et al. we removed CNVs marked as low quality and all the variants from two of  
376 the individuals (NA07346 and NA11918) because they were not included in the phased map. From  
377 Zarrei’s maps we used the stringent map that considered CNVs that appeared in at least 2  
378 individuals and in 2 studies. The complete list of CNVs analysed is available in **S5 Table**.

### 379 **Gene structures**

380 Autosomal gene structures and sequences were retrieved from Ensembl [63]  
381 (<http://www.ensembl.org>; version 75) and principal isoforms were determined according to the  
382 APPRIS database [64], Ensembl version 74. In order to avoid duplicate identification of introns,  
383 intronic regions were defined as regions within introns that aren’t coding in any transcript of any  
384 gene. When analyzing real introns, in order to avoid duplicate identification of introns, the principal  
385 isoform with a higher exonic content was taken. The complete list of genes affected by different  
386 types of CNVs is available in **S6 Table**. Genomic sequences were obtained from the primary  
387 GRCh37/hg19 assembly, and were used for calculating the GC content of introns and intronic  
388 CNVs.

### 389 **Dating gene and intron ages**

390 An age was assigned to all duplicated genes as described in Juan et al. 2013. In the case of  
391 singletons gene ages were assigned from the last common ancestor to all the genes in their family  
392 according to the gene trees retrieved from ENSEMBL. Singleton's ages can be noisy for genes  
393 suffering important alterations as gene fusion/fission events or divergence shifts. As a consequence,  
394 these ages should not be interpreted as the age of the oldest region of the gene, but as a restrictive  
395 definition of gene age considering a similar gene structure and gene product.

396 The ages (from ancient to recent) and number of genes per age are as follows: FungiMetazoa: 1119,  
397 Bilateria: 2892, Chordata: 1152, Euteleostomi: 8230, Sarcopterygii: 182, Tetrapoda: 154, Amniota:  
398 408, Mammalia: 375, Theria: 515, Eutheria: 848, Simiiformes: 233, Catarrhini: 170, Hominoidea:  
399 106, Hominidae: 64, HomoPanGorilla: 204, HomoSapiens: 500. For some analyses, Primates age  
400 groups (Simiiformes to HomoSapiens) were collapsed. For other analyses, we only considered two  
401 extreme groups, "ancient" (collapsing groups from FungiMetazoa to Sarcopterygii) and "young"  
402 genes (Primates).

403 Intronic regions were assigned the evolutionary age of the gene they belonged to. In the cases when  
404 an intron could be assigned to more than one gene, the most recent age was assigned to them.

#### 405 **Statistical assessment of genome-wide distribution of CNVs**

406 To estimate statistical significance of our results we performed permutation tests. In order to  
407 compare the number of overlaps of CNVs with genic functional elements we compared our  
408 observed values to a background model. This model was obtained by relocating all the CNVs in the  
409 whole genome (except for centromeres and telomeres) 10,000 times.

410 In addition, we generated background models correcting by DNA replication timing. For this, we  
411 downloaded DNA replication timing data from 15 cell lines from ENCODE [65,66] and assigned  
412 the median value of all cell lines to each 1 Kb window of the genome. Then, we classified the  
413 genome in 5 intervals of DNA replication timing and we relocated the CNVs within its interval of  
414 replication timing.

415 We compared the location of the CNVs in our datasets and compared with their distribution in the  
416 random models in order to calculate enrichments or depletions depending on the intron size and  
417 gene age and essentiality.

#### 418 **Regulatory features**

419 We downloaded a genome-wide set of regions that are likely to be involved in gene regulation from  
420 the Ensembl Regulatory Build [67]. We checked if introns are enriched in these regulatory features  
421 (promoters, enhancers, promoter flanking regions or insulators) by comparing to a random  
422 background model generated by relocating 10,000 times all regulatory features in the genome. P-  
423 values are the fraction of random values superior or inferior to the observed values.

424 In order to check for the significance of the overlaps between intronic deletions and regulatory  
425 features we relocated 10,000 all intronic deletions within their introns and checked for differences  
426 in overlap with regulatory features.

#### 427 **Gene expression analysis**

428 We used available RNA-seq data at Geuvadis [43] that was derived from lymphoblastoid cell lines  
429 for 445 individuals who were sequenced by the 1000 Genomes Project and for whom we have the

430 intronic deletions in the largest CNV map [36]. We focused our analyses on the 763 genes that have  
431 only one intronic deletion in the population with at least two individuals affected in the Geuadis  
432 dataset. For each of these genes we classified the PEER normalized gene expression levels [68] in  
433 two groups depending if the individual carried or not the intronic deletion and performed Student's  
434 t-tests. We corrected for multiple testing with p.adjust R function (Benjamini-Hochberg method). In  
435 addition, we randomized the individuals with the intronic deletions 10,000 times and calculated the  
436 expected percentages of significantly differentially expressed genes.

437

438

#### 439 **Acknowledgments**

440 The authors thank Salvador Capella, Matthew Bashton, Venetia Bigley, Joris Veltman, Inmaculada  
441 Hernandez and Ruth Rodriguez Barrueco for their constructive comments on the manuscript.  
442 Alfonso Valencia acknowledges the Joint BSC-CRG-IRB Research Program in Computational  
443 Biology and Daniel Rico thanks the Newcastle University Centre for Health and Bioinformatics.  
444 Maria Rigau acknowledges a La Caixa fellowship.

## 445 **References**

- 446 1. Lynch M. *The Origins of Genome Architecture*. Sinauer Associates Incorporated; 2007.
- 447 2. Chorev M, Carmel L. The function of introns. *Front Genet*. 2012;3: 55.
- 448 3. Jo B-S, Choi SS. Introns: The Functional Benefits of Introns in Genomes. *Genomics Inform*.  
449 2015;13: 112.
- 450 4. Gilbert W. The Exon Theory of Genes. *Cold Spring Harb Symp Quant Biol*. 1987;52: 901–  
451 905.
- 452 5. Schwartz SH, Silva J, Burstein D, Pupko T, Eyraş E, Ast G. Large-scale comparative analysis  
453 of splicing signals and their corresponding splicing factors in eukaryotes. *Genome Res*.  
454 2008;18: 88–103.
- 455 6. Gelfman S, Burstein D, Penn O, Savchenko A, Amit M, Schwartz S, et al. Changes in exon-  
456 intron structure during vertebrate evolution affect the splicing pattern of exons. *Genome Res*.  
457 2012;22: 35–50.
- 458 7. Kirkconnell KS, Magnuson B, Paulsen MT, Lu B, Bedi K, Ljungman M. Gene length as a  
459 biological timer to establish temporal transcriptional regulation. *Cell Cycle*. 2017;16: 259–270.
- 460 8. Le Hir H, Nott A, Moore MJ. How introns influence and enhance eukaryotic gene expression.  
461 *Trends Biochem Sci*. 2003;28: 215–220.
- 462 9. Nott A, Meislin SH, Moore MJ. A quantitative analysis of intron effects on mammalian gene



- 463 expression. *RNA*. 2003;9: 607–617.
- 464 10. Gaffney DJ, Keightley PD. Genomic selective constraints in murid noncoding DNA. *PLoS*  
465 *Genet*. 2006;2: e204.
- 466 11. Rose AB. Intron-mediated regulation of gene expression. *Curr Top Microbiol Immunol*.  
467 2008;326: 277–290.
- 468 12. Le Hir H, Nott A, Moore MJ. How introns influence and enhance eukaryotic gene expression.  
469 *Trends Biochem Sci*. 2003;28: 215–220.
- 470 13. Seoighe C, Korir PK. Evidence for intron length conservation in a set of mammalian genes  
471 associated with embryonic development. *BMC Bioinformatics*. 2011;12 Suppl 9: S16.
- 472 14. Eisenberg E, Levanon EY. Human housekeeping genes, revisited. *Trends Genet*. 2013;29:  
473 569–574.
- 474 15. Castillo-Davis CI, Mekhedov SL, Hartl DL, Koonin EV, Kondrashov FA. Selection for short  
475 introns in highly expressed genes. *Nat Genet*. 2002;31: 415–418.
- 476 16. Heyn P, Kircher M, Dahl A, Kelso J, Tomancak P, Kalinka AT, et al. The earliest transcribed  
477 zygotic genes are short, newly evolved, and different across species. *Cell Rep*. 2014;6: 285–  
478 292.
- 479 17. Artieri CG, Fraser HB. Transcript length mediates developmental timing of gene expression  
480 across *Drosophila*. *Mol Biol Evol*. 2014;31: 2879–2889.

- 481 18. Swinburne IA, Silver PA. Intron delays and transcriptional timing during development. *Dev*  
482 *Cell*. 2008;14: 324–330.
- 483 19. Jeffares DC, Penkett CJ, Bähler J. Rapidly regulated genes are intron poor. *Trends Genet*.  
484 2008;24: 375–378.
- 485 20. Keane PA, Seoighe C. Intron Length Coevolution across Mammalian Genomes. *Mol Biol*  
486 *Evol*. 2016;33: 2682–2691.
- 487 21. Eisenberg E, Levanon EY. Human housekeeping genes are compact. *Trends Genet*. 2003;19:  
488 362–365.
- 489 22. Vinogradov AE. Compactness of human housekeeping genes: selection for economy or  
490 genomic design? *Trends Genet*. 2004;20: 248–253.
- 491 23. Carmel L, Koonin EV. A universal nonmonotonic relationship between gene compactness and  
492 expression levels in multicellular eukaryotes. *Genome Biol Evol*. 2009;1: 382–390.
- 493 24. Agrawal A, Hamvas A, Cole FS, Wambach JA, Wegner D, Coghill C, et al. An intronic  
494 ABCA3 mutation that is responsible for respiratory disease. *Pediatr Res*. 2012;71: 633–637.
- 495 25. Lo Y-F, Nozu K, Iijima K, Morishita T, Huang C-C, Yang S-S, et al. Recurrent deep intronic  
496 mutations in the SLC12A3 gene responsible for Gitelman’s syndrome. *Clin J Am Soc*  
497 *Nephrol*. 2011;6: 630–639.
- 498 26. Nurnberg ST, Zhang H, Hand NJ, Bauer RC, Saleheen D, Reilly MP, et al. From Loci to  
499 Biology: Functional Genomics of Genome-Wide Association for Coronary Disease. *Circ Res*.

- 500 NIH Public Access; 2016;118: 586.
- 501 27. Vaz-Drago R, Custódio N, Carmo-Fonseca M. Deep intronic mutations and human disease.  
502 Hum Genet. 2017; doi:10.1007/s00439-017-1809-4
- 503 28. Arlt MF, Wilson TE, Glover TW. Replication stress and mechanisms of CNV formation. Curr  
504 Opin Genet Dev. 2012;22: 204–210.
- 505 29. Conrad DF, Bird C, Blackburne B, Lindsay S, Mamanova L, Lee C, et al. Mutation spectrum  
506 revealed by breakpoint sequencing of human germline CNVs. Nat Genet. 2010;42: 385–391.
- 507 30. Pang AW, MacDonald JR, Pinto D, Wei J, Rafiq MA, Conrad DF, et al. Towards a  
508 comprehensive structural variation map of an individual human genome. Genome Biol.  
509 2010;11: R52.
- 510 31. Zarrei M, MacDonald JR, Merico D, Scherer SW. A copy number variation map of the human  
511 genome. Nat Rev Genet. 2015;16: 172–183.
- 512 32. Pirooznia M, Goes FS, Zandi PP. Whole-genome CNV analysis: advances in computational  
513 approaches. Front Genet. 2015;6: 138.
- 514 33. Abyzov A, Li S, Kim DR, Mohiyuddin M, Stütz AM, Parrish NF, et al. Analysis of deletion  
515 breakpoints from 1,092 humans reveals details of mutation mechanisms. Nat Commun.  
516 2015;6: 7256.
- 517 34. Handsaker RE, Van Doren V, Berman JR, Genovese G, Kashin S, Boettger LM, et al. Large  
518 multiallelic copy number variations in humans. Nat Genet. 2015;47: 296–303.

- 519 35. Sudmant PH, Mallick S, Nelson BJ, Hormozdiari F, Krumm N, Huddleston J, et al. Global  
520 diversity, population stratification, and selection of human copy-number variation. *Science*.  
521 2015;349: aab3761.
- 522 36. Sudmant PH, Rausch T, Gardner EJ, Handsaker RE, Abyzov A, Huddleston J, et al. An  
523 integrated map of structural variation in 2,504 human genomes. *Nature*. 2015;526: 75–81.
- 524 37. Hart T, Chandrashekhar M, Aregger M, Steinhart Z, Brown KR, MacLeod G, et al. High-  
525 Resolution CRISPR Screens Reveal Fitness Genes and Genotype-Specific Cancer Liabilities.  
526 *Cell*. 2015;163: 1515–1526.
- 527 38. Wang T, Birsoy K, Hughes NW, Krupczak KM, Post Y, Wei JJ, et al. Identification and  
528 characterization of essential genes in the human genome. *Science*. 2015;350: 1096–1101.
- 529 39. Blomen VA, Májek P, Jae LT, Bigenzahn JW, Nieuwenhuis J, Staring J, et al. Gene  
530 essentiality and synthetic lethality in haploid human cells. *Science*. 2015;350: 1092–1096.
- 531 40. Juan D, Rico D, Marques-Bonet T, Fernández-Capetillo O, Valencia A. Late-replicating CNVs  
532 as a source of new genes. *Biol Open*. 2014;3. doi:10.1242/bio.20147815
- 533 41. Chen W-H, Trachana K, Lercher MJ, Bork P. Younger genes are less likely to be essential  
534 than older genes, and duplicates are less likely to be essential than singletons of the same age.  
535 *Mol Biol Evol*. 2012;29: 1703–1706.
- 536 42. Petrovski S, Wang Q, Heinzen EL, Allen AS, Goldstein DB. Genic intolerance to functional  
537 variation and the interpretation of personal genomes. *PLoS Genet*. 2013;9: e1003709.

- 538 43. Lappalainen T, Sammeth M, Friedländer MR, 't Hoen PAC, Monlong J, Rivas MA, et al.  
539 Transcriptome and genome sequencing uncovers functional variation in humans. *Nature*.  
540 2013;501: 506–511.
- 541 44. Majewski J, Ott J. Distribution and characterization of regulatory elements in the human  
542 genome. *Genome Res*. 2002;12: 1827–1836.
- 543 45. Schoenfelder S, Furlan-Magaril M, Mifsud B, Tavares-Cadete F, Sugar R, Javierre B-M, et al.  
544 The pluripotent regulatory circuitry connecting promoters to their long-range interacting  
545 elements. *Genome Res*. 2015;25: 582–597.
- 546 46. Javierre BM, Burren OS, Wilder SP, Kreuzhuber R, Hill SM, Sewitz S, et al. Lineage-Specific  
547 Genome Architecture Links Enhancers and Non-coding Disease Variants to Target Gene  
548 Promoters. *Cell*. 2016;167: 1369–1384.e19.
- 549 47. Korb J, Urban AE, Affourtit JP, Godwin B, Grubert F, Simons JF, et al. Paired-end  
550 mapping reveals extensive structural variation in the human genome. *Science*. 2007;318: 420–  
551 426.
- 552 48. McCarroll SA, Kuruvilla FG, Korn JM, Cawley S, Nemes J, Wysoker A, et al. Integrated  
553 detection and population-genetic analysis of SNPs and copy number variation. *Nat Genet*.  
554 Nature Publishing Group; 2008;40: 1166–1174.
- 555 49. Conrad DF, Pinto D, Redon R, Feuk L, Gokcumen O, Zhang Y, et al. Origins and functional  
556 impact of copy number variation in the human genome. *Nature*. 2010;464: 704–712.

- 557 50. Sudmant PH, Kitzman JO, Antonacci F, Alkan C, Malig M, Tsalenko A, et al. Diversity of  
558 human copy number variation and multicopy genes. *Science*. 2010;330: 641–646.
- 559 51. Juan D, Rico D, Marques-Bonet T, Fernandez-Capetillo O, Valencia A. Late-replicating CNVs  
560 as a source of new genes. *Biol Open*. 2013;3: 231–231.
- 561 52. Gaffney DJ, Keightley PD. Genomic selective constraints in murid noncoding DNA. *PLoS*  
562 *Genet*. 2006;2: e204.
- 563 53. Kirkconnell KS, Magnuson B, Paulsen MT, Lu B, Bedi K, Ljungman M. Gene length as a  
564 biological timer to establish temporal transcriptional regulation. *Cell Cycle*. 2017;16: 259–270.
- 565 54. Pennacchio LA, Loots GG, Nobrega MA, Ovcharenko I. Predicting tissue-specific enhancers  
566 in the human genome. *Genome Res*. 2007;17: 201–211.
- 567 55. Zhang F, Lupski JR. Non-coding genetic variants in human disease. *Hum Mol Genet*. 2015;24:  
568 R102–10.
- 569 56. Northcott PA, Lee C, Zichner T, Stütz AM, Erkek S, Kawauchi D, et al. Enhancer hijacking  
570 activates GFI1 family oncogenes in medulloblastoma. *Nature*. 2014;511: 428–434.
- 571 57. Puente XS, Beà S, Valdés-Mas R, Villamor N, Gutiérrez-Abril J, Martín-Subero JI, et al. Non-  
572 coding recurrent mutations in chronic lymphocytic leukaemia. *Nature*. 2015;526: 519–524.
- 573 58. Zhang X, Choi PS, Francis JM, Imielinski M, Watanabe H, Cherniack AD, et al. Identification  
574 of focally amplified lineage-specific super-enhancers in human epithelial cancers. *Nat Genet*.  
575 2016;48: 176–182.

- 576 59. Khurana E, Fu Y, Chakravarty D, Demichelis F, Rubin MA, Gerstein M. Role of non-coding  
577 sequence variants in cancer. *Nat Rev Genet.* 2016;17: 93–108.
- 578 60. Weischenfeldt J, Dubash T, Drainas AP, Mardin BR, Chen Y, Stütz AM, et al. Pan-cancer  
579 analysis of somatic copy-number alterations implicates IRS4 and IGF2 in enhancer hijacking.  
580 *Nat Genet.* 2017;49: 65–74.
- 581 61. Fudenberg G, Getz G, Meyerson M, Mirny LA. High order chromatin architecture shapes the  
582 landscape of chromosomal alterations in cancer. *Nat Biotechnol.* 2011;29: 1109–1113.
- 583 62. Zhang C-Z, Leibowitz ML, Pellman D. Chromothripsis and beyond: rapid genome evolution  
584 from complex chromosomal rearrangements. *Genes Dev.* 2013;27: 2513–2530.
- 585 63. Yates A, Akanni W, Amode MR, Barrell D, Billis K, Carvalho-Silva D, et al. Ensembl 2016.  
586 *Nucleic Acids Res.* 2016;44: D710–6.
- 587 64. Rodriguez JM, Maietta P, Ezkurdia I, Pietrelli A, Wesselink J-J, Lopez G, et al. APPRIS:  
588 annotation of principal and alternative splice isoforms. *Nucleic Acids Res.* 2013;41: D110–7.
- 589 65. Thurman RE, Day N, Noble WS, Stamatoyannopoulos JA. Identification of higher-order  
590 functional domains in the human ENCODE regions. *Genome Res.* 2007;17: 917–927.
- 591 66. Hansen RS, Thomas S, Sandstrom R, Canfield TK, Thurman RE, Weaver M, et al. Sequencing  
592 newly replicated DNA reveals widespread plasticity in human replication timing. *Proc Natl*  
593 *Acad Sci U S A.* 2010;107: 139–144.
- 594 67. Zerbino DR, Wilder SP, Johnson N, Juettemann T, Flicek PR. The ensembl regulatory build.

595 Genome Biol. 2015;16: 56.

596 68. Stegle O, Parts L, Durbin R, Winn J. A Bayesian framework to account for complex non-

597 genetic factors in gene expression levels greatly increases power in eQTL studies. PLoS

598 Comput Biol. 2010;6: e1000770.



599 **Figure captions**

600 **Fig 1. Types of CNVs in the different datasets.** (A) CNVs can overlap entire genes or fractions of  
601 genes. CNVs overlapping with exons of a gene (exonic CNVs) and CNVs found within introns  
602 (intronic CNVs). (B-D) Number of whole gene, exonic and intronic CNV events, showing the  
603 different proportions of CNV gains, losses and gain and loss CNVs. (E-F) Venn diagrams showing  
604 the number of genes with whole gene, exonic and intronic losses (E) or gains (F) in the three maps  
605 with the higher number of deletions reported (Zarrei, Sudmant-Nature and Abyzov). Circle sizes are  
606 proportional to the number of genes affected.

607 **Fig 2. Evolutionary age of affected genes.** Percentage of genes from each gene evolutionary age  
608 that contain deletions overlapping with exons, including partial and whole gene CNVs (A) or  
609 intronic deletions (B). The light blue line represents the expected value, calculated as the mean of  
610 the genes in the 10,000 random permutations. Red asterisks mark the significantly enriched groups  
611 of genes, while black asterisks mark gene age groups with fewer deletions than expected ( $P < 0.05$ ).  
612 Plot (C) shows, from all the genes overlapping with deletions after aggregating the three maps,  
613 what is the proportion of genes that have all or part of their exons affected by deletions and what is  
614 the percentage of genes with intronic deletions only. Bar width is proportional to the percentage of  
615 genes from each evolutionary age that is affected by deletions of any kind, which spans from 18.5%  
616 (Mammalia) to 49.8% (HomoPanGorilla). The equivalent figure for each separate map is shown in  
617 S7 Fig.

618 **Fig 3. Changes in intron and gene size.** (A) Proportion of the reference intron that has been  
619 observed as deleted in any of the studies. (B) Proportion of the whole intronic content of a gene that

620 has been observed as deleted. (C) Change in gene length by intronic deletions. (D) Example of gene  
621 with a substantial change in gene size with a single intronic deletion.

622 **Fig 4. Differential expression.** (A) Number of genes with whole gene, exonic or intronic deletions  
623 or with intergenic deletions in a region in long-range contact with it. (B) Differentially expressed  
624 genes (DEGs) for each type of deletion. The colored bars show the observed number of DEGs per  
625 group. The white bars represent the median random number of DEGs when randomizing 10,000  
626 times the individuals with and without the deletion. Significant differences ( $P < 0.05$ ) are marked  
627 with \* ( $P < 0.0001$  in all cases) and error bars show median absolute deviation.

628 **Fig 5. Impact of CNVs on genes and their evolution.** Evolutionarily ancient and young genes  
629 accumulate different kinds of structural variants. While young genes are enriched in coding  
630 deletions (which alter gene dosage or disrupt the protein, sometimes affecting gene expression),  
631 ancient genes have highly conserved coding sequence but an enrichment of deletions within their  
632 introns. As we have shown, these changes in introns are sometimes associated with changes in gene  
633 expression, showing that although the protein is highly conserved, the expression of it can change  
634 from an individual to another due to changes in regulation.

635

## 636 **Supporting information**

637 **S1 Fig. Comparison of datasets.** Only variants in autosomes are considered and private events are  
638 excluded. (A) Number and type of CNVs per dataset. (B) Autosomal Mb that are CNV. Gray part  
639 of the bars corresponds to the CNV Mbs that are shared among maps. Colored parts of the bars are

640 map-specific CNV regions. (C) Width distribution of gains and losses in each map bean lines and  
641 overall line are means). (D) Number of subjects and number of populations of origin used for  
642 building of each filtered map.

643 **S2 Fig. Overlap of genes affected among datasets.** Number of genes overlapping with CNVs (A)  
644 or found completely within a CNV (B) by number of maps in which the overlap is observed.

645 **S3 Fig. Enrichment of deletions in introns of different sizes.** Number of deletions in each size  
646 bin. The light blue line represents the expected value, calculated as the mean of the affected introns  
647 in the 10,000 random permutations. Red asterisks mark the bins significantly enriched with intronic  
648 deletions ( $P < 0.05$ ).

649 **S4 Fig: Differential effect of CNVs on protein coding genes of different evolutionary ages.** The  
650 proportion of genes with CNVs (gains, losses and gain and loss CNVs) affecting their coding region  
651 in each gene age class is shown. Red stars show a significantly higher percentage of genes with  
652 coding compared to 10,000 randomizations of the CNVs over the genome ( $P < 0.05$ ). Black stars  
653 show in which age groups there is a depletion of coding CNVs ( $P < 0.05$ ).

654 **S5 Fig. Differential effect of intronic deletions in introns and protein coding genes of different**  
655 **evolutive ages.** Figure (A) shows the percentage of introns over 1.5kb that contain intronic  
656 deletions. Introns shared among genes of different gene ages were assigned the youngest age.  
657 Figure (B) represents the percentage of genes with introns over 1.5kb that have intronic deletions.  
658 In all plots, red stars show a significantly higher percentage of introns or genes with intronic  
659 deletions compared to 10,000 randomizations of the deletions over the genome ( $P < 0.05$ ). Black  
660 stars show in which age groups there is a depletion of intronic deletions ( $P < 0.05$ ).

661 **S6 Fig. Essential genes.** (A) Percentage of essential genes per evolutionary age. (B) Intron sizes of  
662 non-essential and essential genes. (C) Percentage of non-essential (solid bars) and essential (empty  
663 bars) genes of different evolutionary ages that have intronic deletions. Red stars show a  
664 significantly higher percentage of genes with intronic deletions compared to 10,000 randomizations  
665 of the deletions over the genome ( $P < 0.05$ ).

666 **S7 Fig. Effect of the different types of deletions on all evolutionary ages.** Proportion of genes  
667 with deletions that have the whole locus deleted, only part of their exons (exonic) affected by  
668 deletions or intronic deletions only. (Equivalent to Fig. 2C, but here separated by CNV map.)

669 **S8 Fig. GC content in introns and intronic deletions.** (A) Bean-plots showing the different GC  
670 distribution between the flanking exons of introns with or without deletions, separated by intron  
671 size bins (with equal number of introns per bin). (B) GC content distributions in introns with or  
672 without deletions, separated by intron size bins. Significance is considered for p-values  $< 0.05$ .  
673 Beans show the estimated density of each distribution; horizontal lines show the mean values of  
674 each side of the bean and the dashed horizontal line represents the overall average of all values.

675 **S9 Fig. Examples of introns with a drop of GC content.** X-axis represents the coordinates of the  
676 intron with its flanking exons (black boxes). Y-axis shows the GC content, calculated with sliding  
677 200 bp windows. The deleted region is highlighted in grey.

678 **S10 Fig. Overlap of genes with different types of deletions.** Venn diagram showing the overlaps  
679 for genes carrying different types of mutations (A) and for differentially expressed genes (DEGs)  
680 (B).

- 681 **S1 Table. Number of individuals in each map, project the variants belong to and methods**  
682 **used for CNV detection.**
- 683 **S2 Table. Enrichment of intronic deletions in non-essential and essential genes.**
- 684 **S3 Table. Overlap of intronic deletions with regulatory features.**
- 685 **S4 Table. Differentially expressed genes.**
- 686 **S5 Table. Filtered CNV maps used in this study.**
- 687 **S6 Table. Genes affected by CNVs, including their ages.**

**A)**

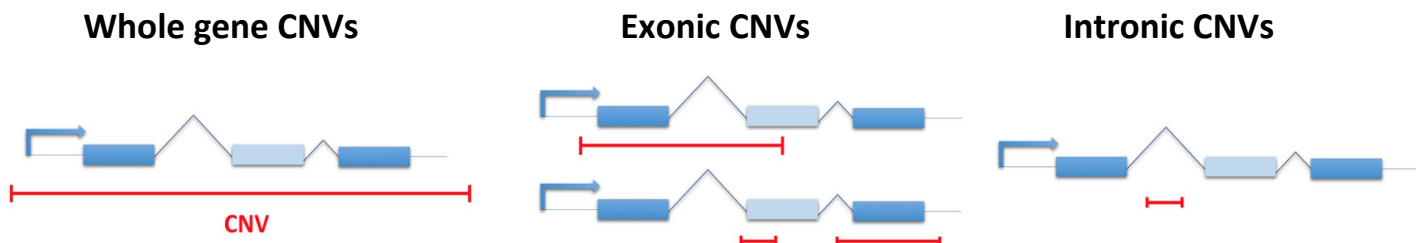

**B)**

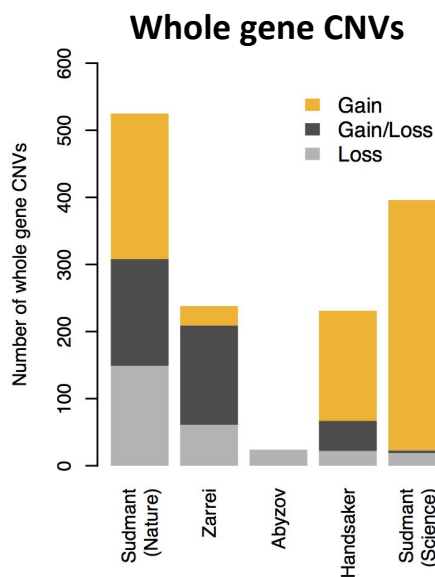

**C)**

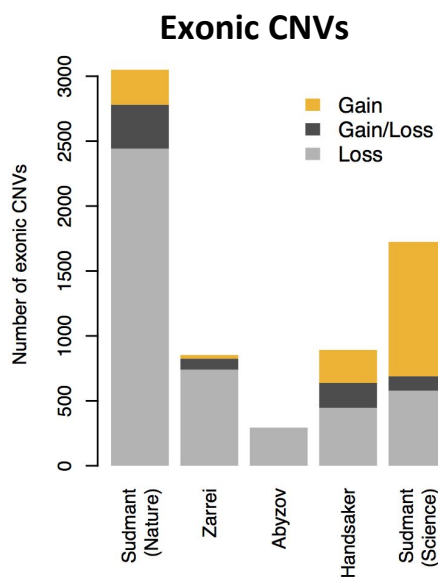

**D)**

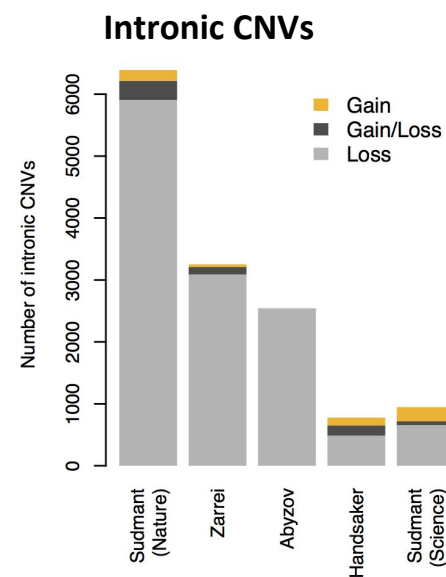

**E)**

**Genes with losses**

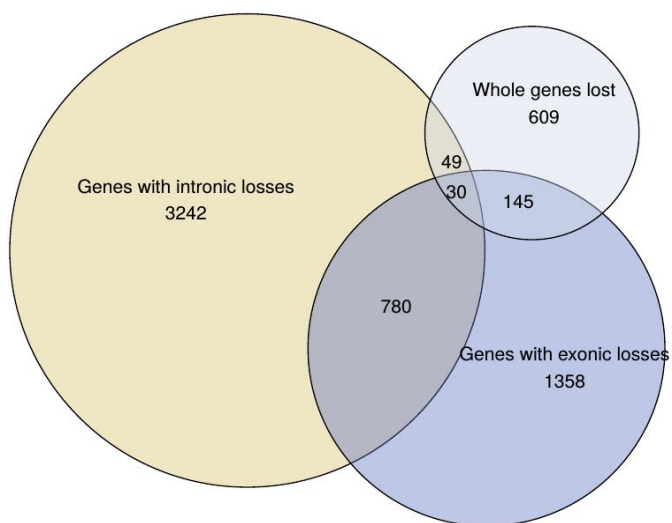

**F)**

**Genes with gains**

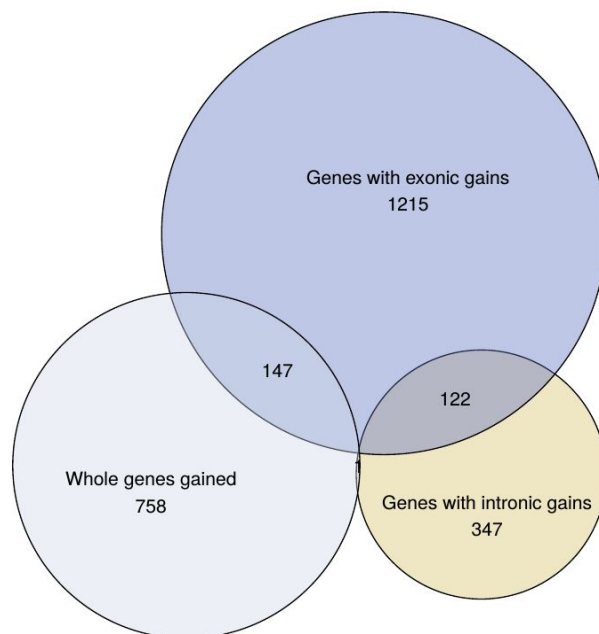

## A) Coding deletions

### Sudmant (Nature)

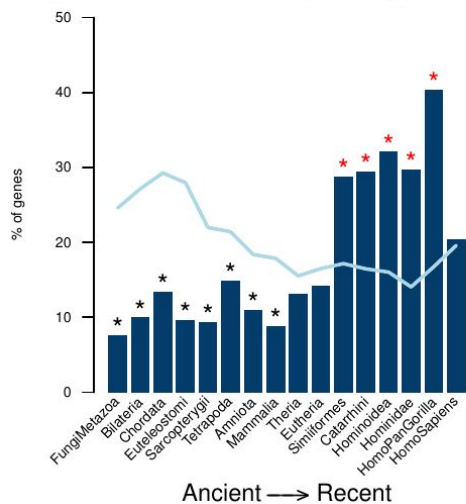

### Zarrei

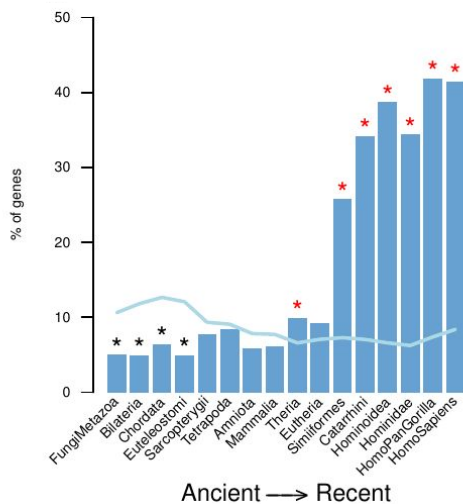

### Abyzov

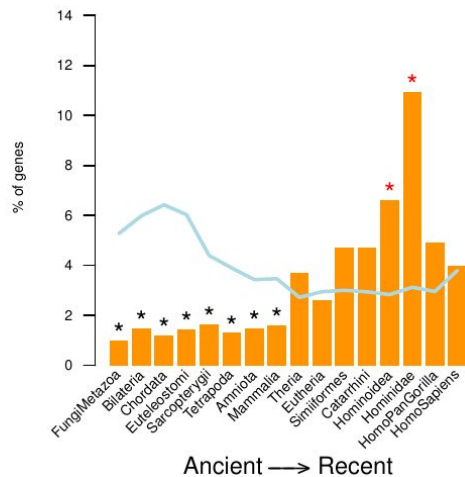

## B) Intronic deletions

### Sudmant (Nature)

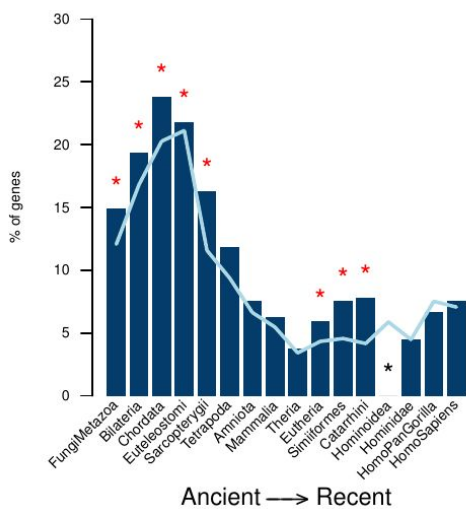

### Zarrei

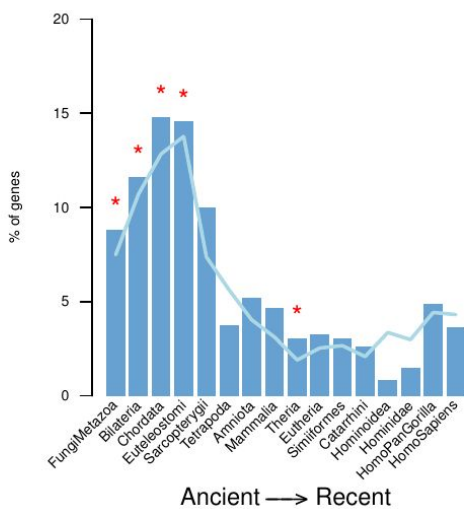

### Abyzov

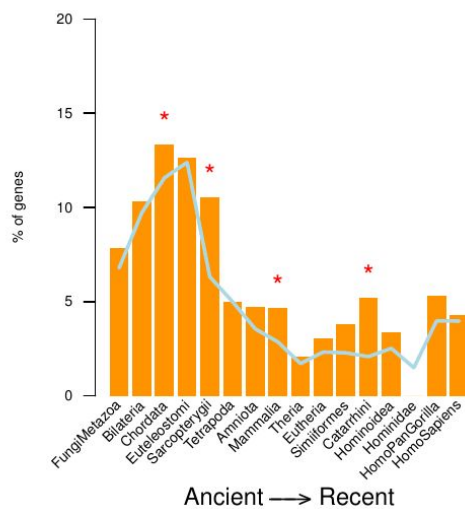

## C)

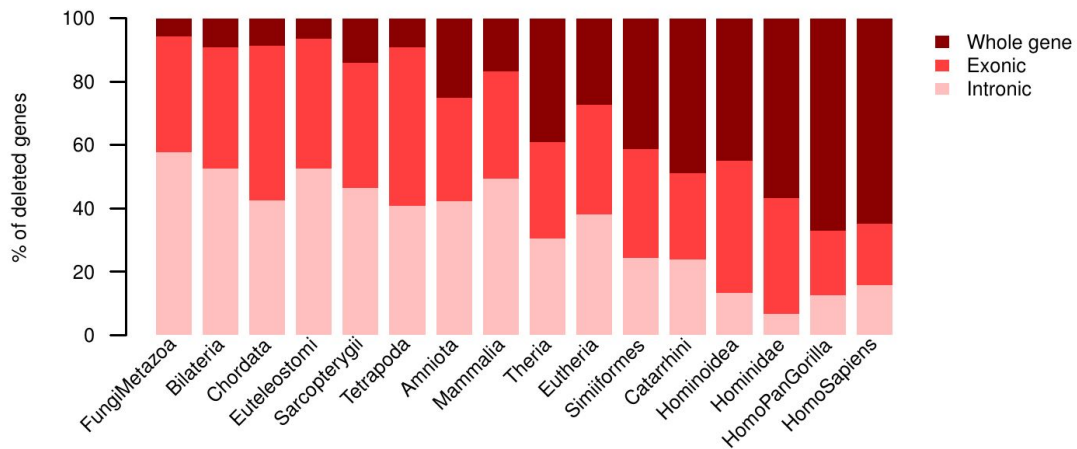

### A) Proportion of intron lost

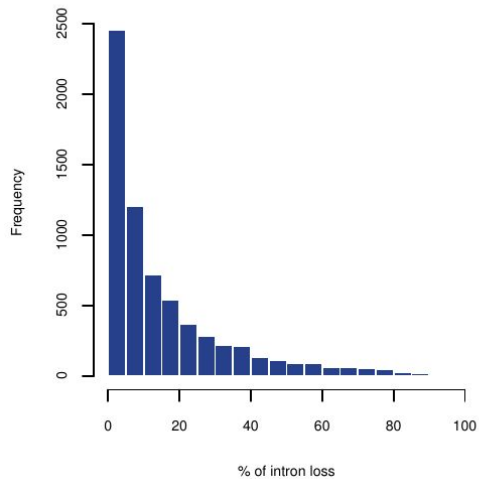

### B) Proportion of intronic content lost per gene

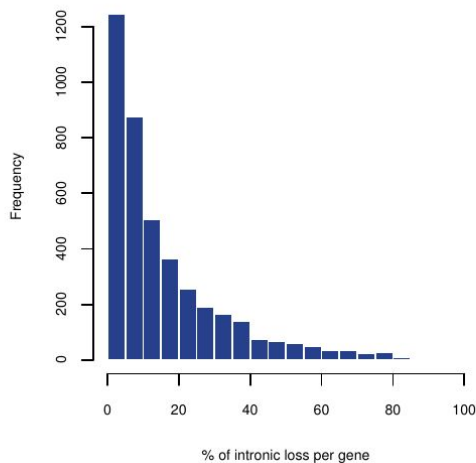

### C) Change in gene length by intronic losses

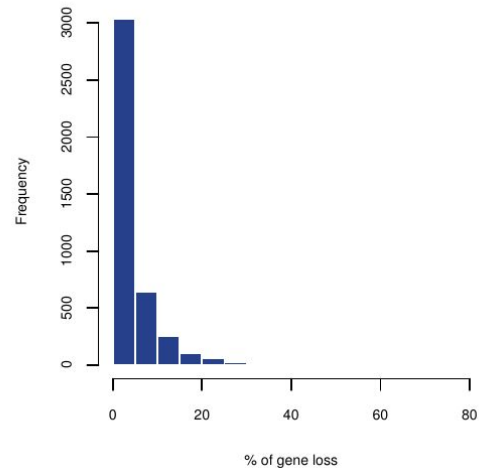

### D) *SLC1A* gene

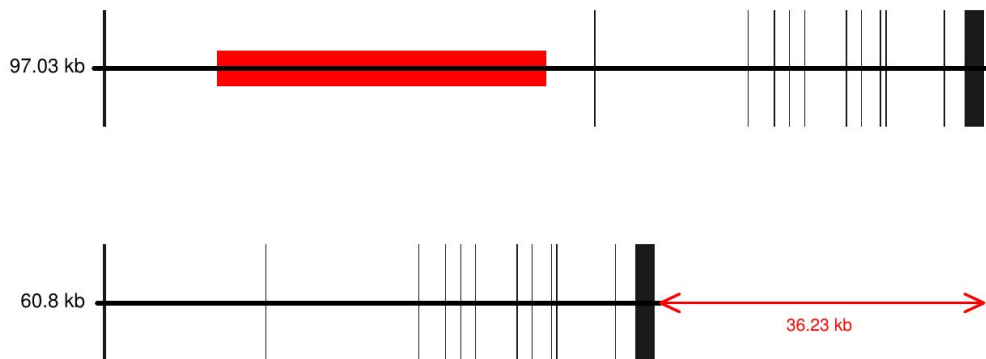



**A)**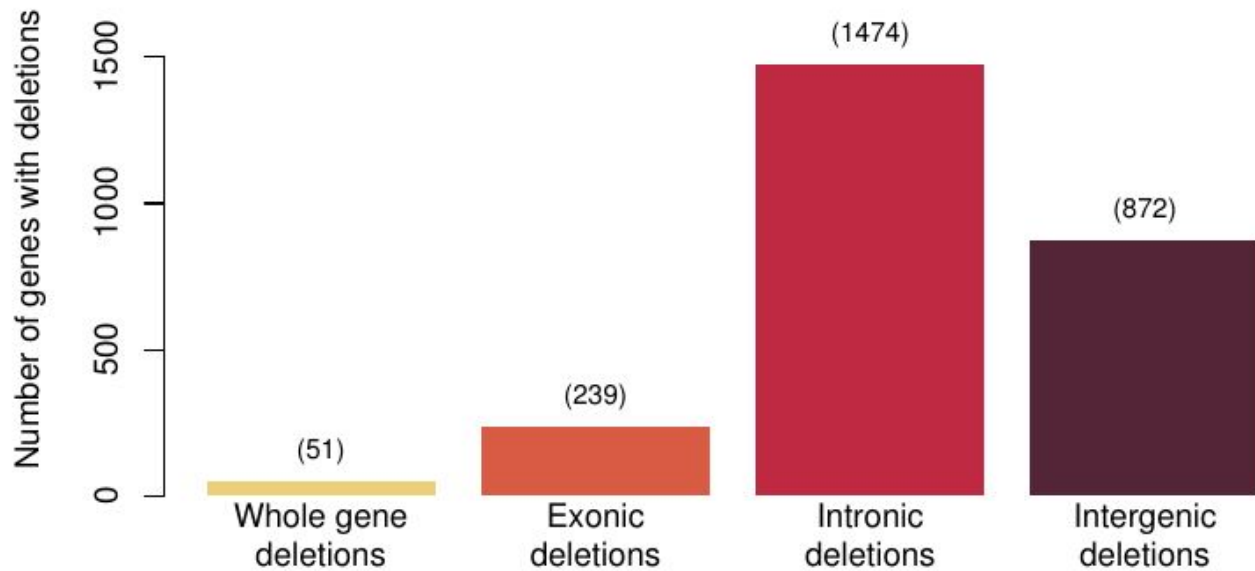**B)**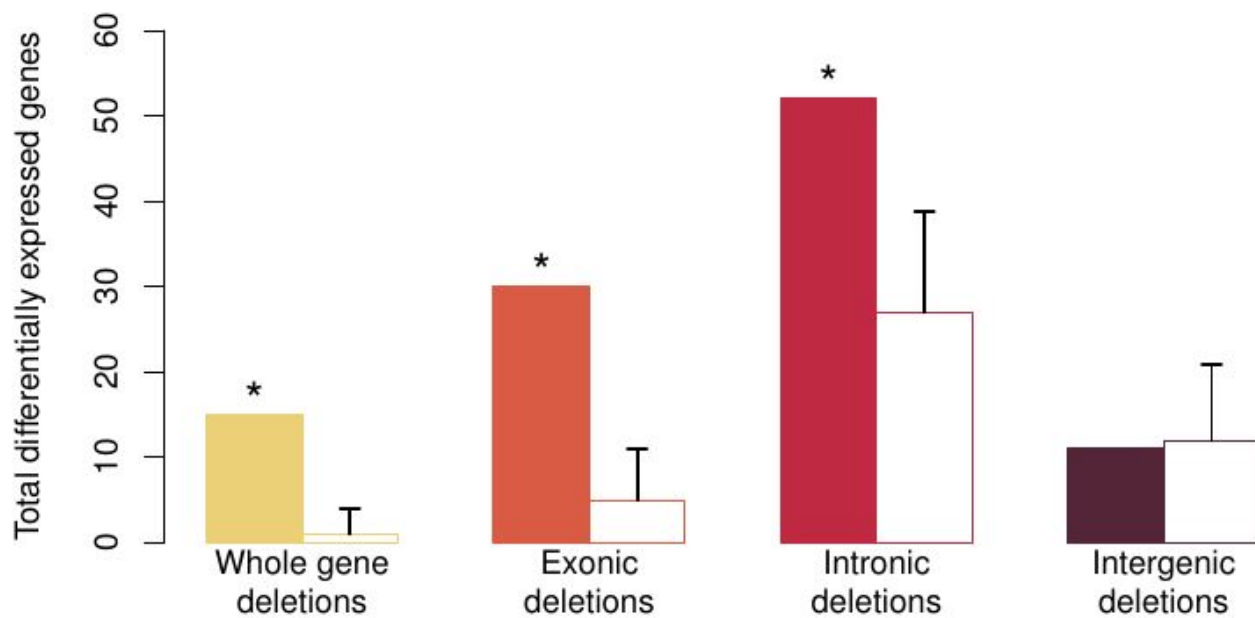

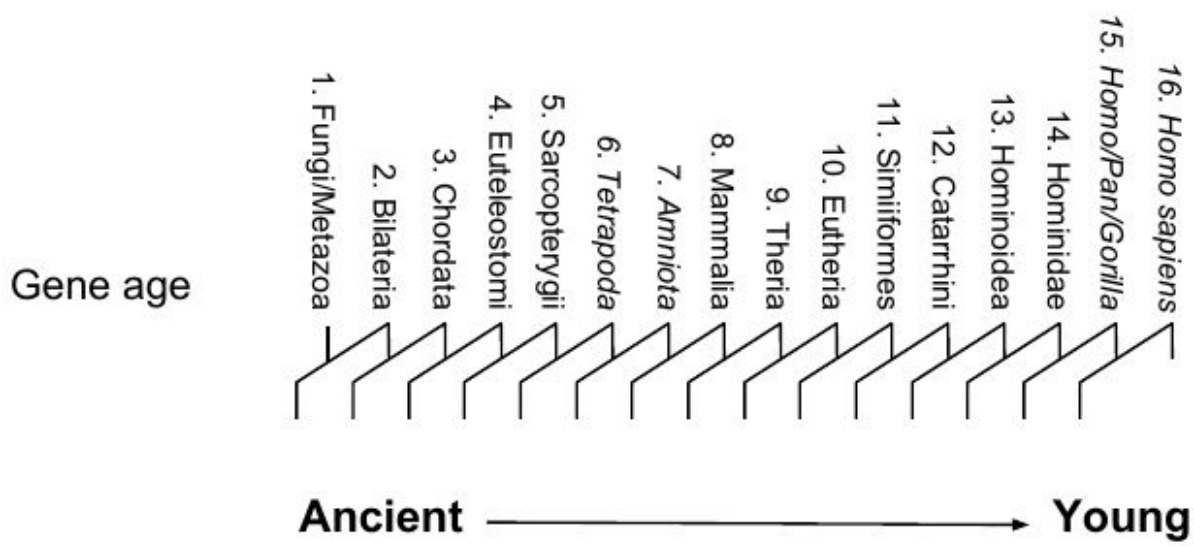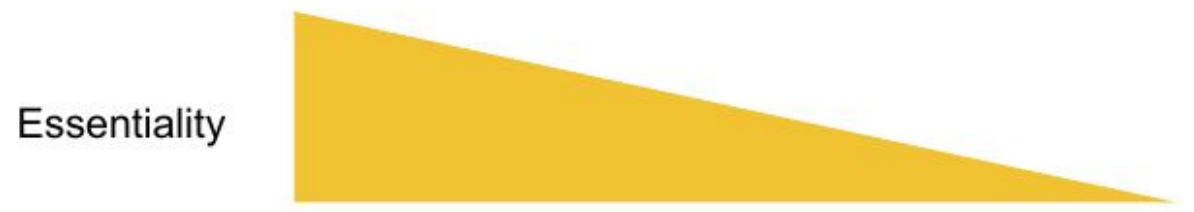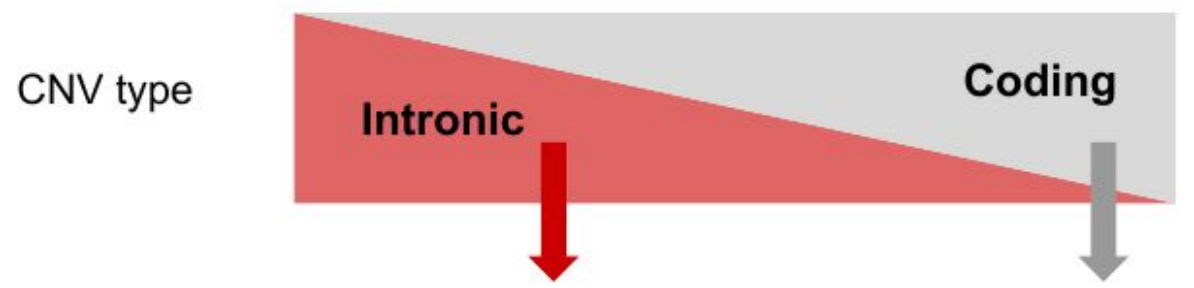

CNV effect

Transcription variability:  
 (Timing, expression levels, splicing)

Birth and death of genes  
 Reshaping of proteins
